# Supplementary material for: Reproductive Aging Drives Protein Accumulation in the Uterus and Limits Lifespan in C. elegans
Source: PLoS Genet. 2015 Dec 11;11(12):e1005725. doi: 10.1371/journal.pgen.1005725 (PMC4676719; doi:10.1371/journal.pgen.1005725)
Supplement: S5 Table — (XLSX) [file pgen.1005725.s014.xlsx]

## Sheet: C. elegans strains
Name	Genotype	Insert - forward primer	Insert - reverse primer	Reference
SD1968	unc-119(ed3); ex[ule-1:Dendra2; Cbr-unc-119] line #1	agaggtactgtagaggcattgtagggttac	tcgctaatttattattttttttttgaaaaa	this study
SD1969	unc-119(ed3); ex[ule-1:Dendra2; Cbr-unc-119] line #2	agaggtactgtagaggcattgtagggttac	tcgctaatttattattttttttttgaaaaa	this study
SD1973	unc-119(ed3); ex[ule-2:Dendra2; Cbr-unc-119] line #1	AGTTGACAACCGTTTCAAGTTGTatataag	TGGTAGAGAAAGCGGAGGGAacactaaaaa	this study
SD1972	unc-119(ed3); ex[ule-2:Dendra2; Cbr-unc-119] line #2	AGTTGACAACCGTTTCAAGTTGTatataag	TGGTAGAGAAAGCGGAGGGAacactaaaaa	this study
SD1981	unc-119(ed3); ex[ule-3:eGFP; Cbr-unc-119] line #1	gcgggtgtcgacaaaatcag	tcaggttaacagttgtgttcgga	this study
SD1979	unc-119(ed3); ex[ule-3:eGFP; Cbr-unc-119] line #2	gcgggtgtcgacaaaatcag	tcaggttaacagttgtgttcgga	this study
SD1983	unc-119(ed3); ex[ule-4:eGFP; Cbr-unc-119] line #1	cgacgttgagagatggctgt	agtttccacctgtttcaacgg	this study
SD1984	unc-119(ed3); ex[ule-4:eGFP; Cbr-unc-119] line #2	cgacgttgagagatggctgt	agtttccacctgtttcaacgg	this study
SD1976	unc-119(ed3); ex[ule-5:Dendra2; Cbr-unc-119] line #1	tctttcagcttacggaaatctttaaaaaga	tacatggtacaacttggatgaaatgaatgt	this study
SD1975	unc-119(ed3); ex[ule-5:Dendra2; Cbr-unc-119] line #2	tctttcagcttacggaaatctttaaaaaga	tacatggtacaacttggatgaaatgaatgt	this study
SD1859	unc-119(ed3); ex[Cbr-unc-119]			Zimmerman and Kim 2014

## Sheet: RNAi bacteria strains
Gene	Forward primer	Reverse primer
F49E11.10	AAACTACGCAAACGGGTGTC	GAACAGGTTGCTCCCGATAC
K07H8.6	TCTTCAATGGCCAGCTCTCT	AAGCTCCATGGTGTTCAAGG
C46C2.5	TGGCTTCAATCGGAAAATTG	AAGGTCAACTCCTGCGAAAA
W10D5.2	AAAGGGTATTGCCACCACAG	CCATTTTGCTTCTGGCATTT
D1086.10c	ATCTGCTACGCCCACACTCT	ATCTGATTCCCGTTGTCCAC
Y38F1A.6	CAACCAAAGAACCCAATGCT	TCGAATCCCATTCCTTTCAG
C42C1.14	TCGTACAACACCACCTCCAA	TCTGGTGCTTGATGACCTTG
Y48E1B.9b	TCTGTGCAGTAGCCATCAGC	TGCAAAAACCCCCAATATGT
F54D11.1	TGGAAACAACACTGGACTCG	AAGCTTCTCGGTGTCTGGAA
F15E11.14	CGAACCATCAGGTGTGACAG	TGTAGTTTGGGCATGGTCTTC
F32D8.12c	AGTGCTCCGTGAGCAAGATT	GGTGAGGCTCCAGAATCAAA
F10G7.11	CCACAATGAAGTGGATTCTCG	GAAAAACCAATCAATCAAAACAAA
F13G11.3	GTACCCCTCCACCAATTGTC	CCGGATCTCATTGCAAAAAT
W03F11.1	CTGGCTTCTGCTACCTGTCC	CATTTGGTGGGTAGGCAGTT
D1007.14	ATCCAAAATGGTGGTGGAAA	CTTTGCTCCAACTCCTGAGC
JC8.14	TTTGCTCTTTTGGTGCTCCT	TGGAAGCTTGAAACGGATCT
ZK970.7	CTTGCTCTTTTCTCCGTTGC	ATTGTCCTTGAGCCTTCTCG
fog-2	ACATGCCAATGGAGACGGTT	GCAGTGAGAAAGGACACCGA
